# Supplementary material for: From discrete borate cluster to three-dimensional open framework
Source: Royal Society of Chemistry journal article supplement (doi:10.1039/c3ce40327k), 2013-01-01
Supplement: c3ce40327k.pdf [file c3ce40327k.pdf]

## Supporting Information:

# From Discrete Borate Cluster to Three-Dimensional Open Framework

Lian-Zhi Wu, Lin Cheng, Jin-Ni Shen and Guo-Yu Yang\*

State Key Laboratory of Structural Chemistry, Fujian Institute of Research on the Structure of Matter, Chinese Academy of Sciences, Fuzhou, Fujian 350002, China. Fax: +86-591/8371-0051; E-mail: ygy@fjirm.ac.cn.

Table S1. Hydrogen bonds for **1** [Å and °].

| D-H...A               | d(D-H) | d(H...A) | d(D...A) | ∠(DHA) |
|-----------------------|--------|----------|----------|--------|
| O(1)-H(1A)...O(7)#2   | 0.82   | 1.91     | 2.730(4) | 177.3  |
| O(8)-H(8A)...O(3)#3   | 0.82   | 1.96     | 2.736(4) | 157.8  |
| O(12)-H(12A)...O(2)#4 | 0.82   | 1.94     | 2.736(3) | 164.0  |
| N(2)-H(2C)...O(6)#2   | 0.89   | 2.01     | 2.888(4) | 170.6  |
| N(2)-H(2D)...O(5)#5   | 0.89   | 2.12     | 2.977(4) | 162.4  |
| N(2)-H(2D)...O(13)#5  | 0.89   | 2.62     | 3.072(4) | 112.6  |
| N(2)-H(2E)...O(13)#2  | 0.89   | 2.15     | 2.938(4) | 147.0  |
| N(3)-H(3C)...O(8)#6   | 0.89   | 1.94     | 2.768(4) | 154.2  |
| N(3)-H(3C)...O(3)#7   | 0.89   | 2.53     | 3.096(4) | 122.1  |
| N(3)-H(3D)...O(2)#5   | 0.89   | 2.67     | 3.297(4) | 128.4  |
| N(3)-H(3E)...O(5)#5   | 0.89   | 2.04     | 2.798(4) | 142.3  |
| N(3)-H(3E)...O(4)#5   | 0.89   | 2.31     | 3.074(4) | 143.8  |

Symmetry transformations used to generate equivalent atoms: #1 -x+2,-y-1,-z; #2 -x+1,-y-1,-z; #3 x,y-1,z; #4 -x+1,y+1/2,-z-1/2; #5 x-1,y,z; #6 -x,y+1/2,-z-1/2; #7 -x,y-1/2,-z-1/2

Table S2. Hydrogen bonds for **2** [Å and °].

| D-H...A                | d(D-H) | d(H...A) | d(D...A) | ∠(DHA) |
|------------------------|--------|----------|----------|--------|
| N(1)-H(1A)...O(3W)     | 0.90   | 1.89     | 2.723(5) | 153.1  |
| N(1)-H(1B)...O(12)     | 0.90   | 2.04     | 2.930(4) | 169.9  |
| N(1)-H(1C)...O(8)#5    | 0.90   | 2.00     | 2.857(4) | 158.3  |
| N(1)-H(1C)...O(10)#5   | 0.90   | 2.31     | 3.030(4) | 137.0  |
| N(2)-H(2A)...O(2W)#11  | 0.89   | 2.01     | 2.834(5) | 153.3  |
| N(2)-H(2B)...O(20)#11  | 0.89   | 1.89     | 2.773(4) | 170.4  |
| N(2)-H(2C)...O(6)#9    | 0.89   | 2.12     | 2.904(4) | 146.6  |
| N(3)-H(3A)...O(3W)#9   | 0.90   | 2.45     | 3.211(6) | 142.5  |
| N(4)-H(4A)...O(1W)#1   | 0.89   | 2.03     | 2.784(5) | 141.2  |
| N(4)-H(4B)...O(1)#1    | 0.89   | 2.06     | 2.813(4) | 141.5  |
| N(4)-H(4B)...O(2)#1    | 0.89   | 2.51     | 3.127(4) | 126.8  |
| N(4)-H(4C)...O(18)#6   | 0.89   | 2.10     | 2.965(4) | 162.3  |
| N(4)-H(4C)...O(5)#6    | 0.89   | 2.60     | 3.312(4) | 138.1  |
| N(5)-H(5A)...O(4W)     | 0.90   | 1.87     | 2.762(5) | 170.8  |
| N(5)-H(5B)...O(5)#7    | 0.90   | 1.95     | 2.838(4) | 168.3  |
| N(5)-H(5C)...O(11)     | 0.90   | 1.89     | 2.785(4) | 174.3  |
| N(5)-H(5C)...O(14)     | 0.90   | 2.65     | 3.249(4) | 124.6  |
| N(6)-H(6A)...O(1W)     | 0.90   | 2.11     | 2.868(4) | 141.0  |
| O(3W)-H(3WA)...O(4)    | 0.85   | 2.56     | 3.343(6) | 154.0  |
| O(3W)-H(3WA)...O(6)    | 0.85   | 2.58     | 3.201(6) | 130.7  |
| O(3W)-H(3WB)...O(2W)#4 | 0.85   | 2.61     | 3.359(6) | 148.3  |

Symmetry transformations used to generate equivalent atoms: #1 -x+3,y-1/2,-z+2; #2 -x+3,y+1/2,-z+3; #3 -x+2,y+1/2,-z+2; #4 x,y+1,z; #5 -x+2,y+1/2,-z+3; #6 x,y-1,z; #7 -x+2,y-1/2,-z+2; #8 -x+3,y+1/2,-z+2; #9 -x+2,y-1/2,-z+3; #10 -x+3,y-1/2,-z+3; #11 x-1,y,z

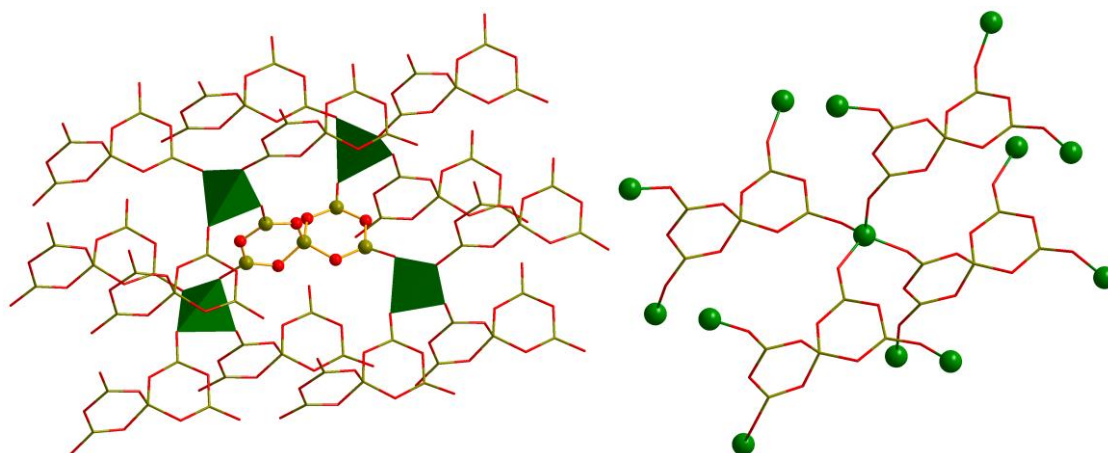

**Figure S1.** Views of the linkage of  $B_5O_{10}$  cluster units and  $AlO_4$  groups in **2**. Each  $B_5O_{10}/AlO_4$  units is bridged by four  $AlO_4/B_5O_{10}$  groups to 12 other  $B_5O_{10}/AlO_4$  units.

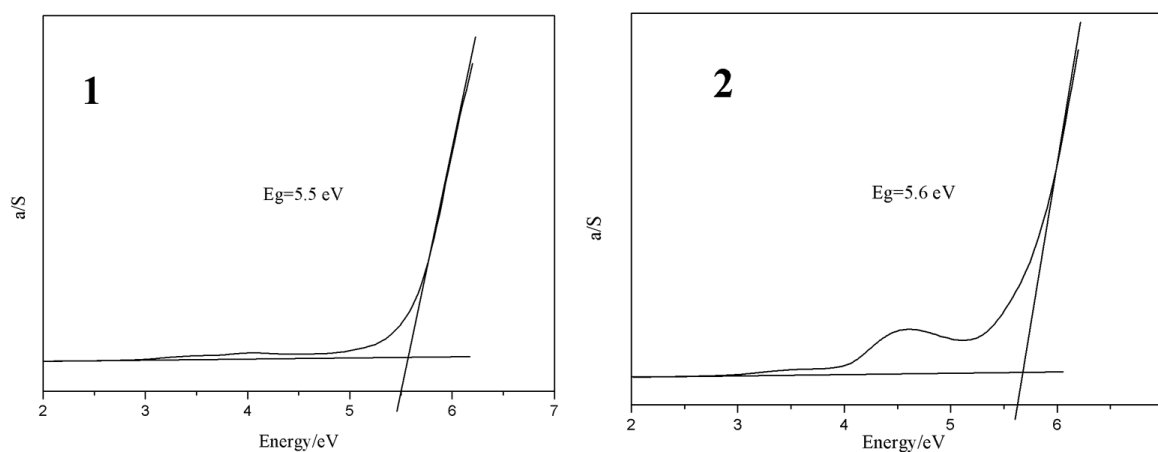

**Figure S2.** Optical diffuse reflectance spectra for **1** (a) and **2** (b), respectively.

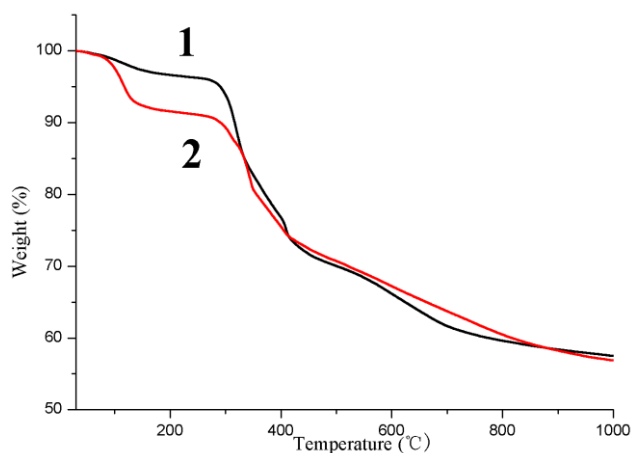

**Figure S3.** TG curve of **1** and **2**, respectively.

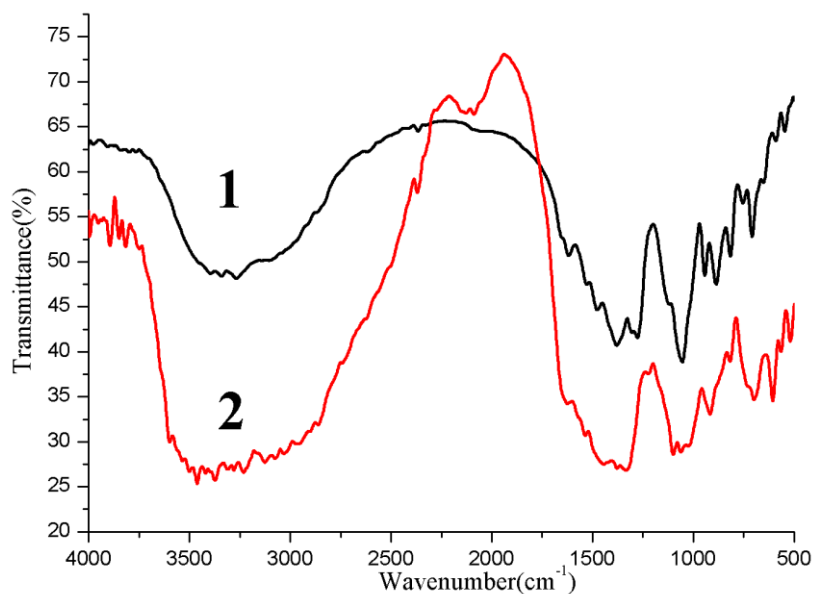

**Figure S4.** IR spectra of **1** and **2**.

Infrared spectroscopy was used to verify the nature of the borate groups and the presence of amine in the structure. For **1**, the strong bands at  $\sim 1377$ ,  $1276\text{ cm}^{-1}$  in the spectra are consistent with the existence of trigonally coordinated boron, while the bands at  $1057$ ,  $945$  and  $886\text{ cm}^{-1}$  are characteristic of tetrahedral boron.<sup>1,2</sup> The broad bands in the range of  $3401\text{--}3059\text{ cm}^{-1}$  correspond to the stretching bands of the N-H, C-H, and O-H. The bending bands of N-H and C-H are presented at about  $1617\text{--}1478\text{ cm}^{-1}$ . For **2**, the bands at  $\sim 1329$ ,  $\sim 1377\text{ cm}^{-1}$  in the spectra are consistent with the existence of trigonally coordinated boron, while the bands at  $1100\text{--}1014\text{ cm}^{-1}$  are characteristic of tetrahedral boron.<sup>1,2</sup> The broad bands at  $3460\text{--}2851\text{ cm}^{-1}$  correspond to the stretching bands of the N-H and C-H. The bending bands of N-H and C-H are presented at about  $1634\text{--}1441\text{ cm}^{-1}$ . In addition, the bands at  $912\text{--}700\text{ cm}^{-1}$  are characteristic of the stretching vibrations of tetrahedral  $\text{AlO}_4$  groups.<sup>3</sup>

1. C. E. Weir, *Journal of Research of the National Bureau of Standards Section a-Physics and Chemistry*, 1966, **A70**, 153.

2. C. E. Weir and R. Schroeder, *Journal of Research of the National Bureau of Standards Section a-Physics and Chemistry*, 1964, **A68**, 465.

3. S. Cavalu and V. Simon, *Journal of Optoelectronics and Advanced Materials*, 2007, **9**, 3297.

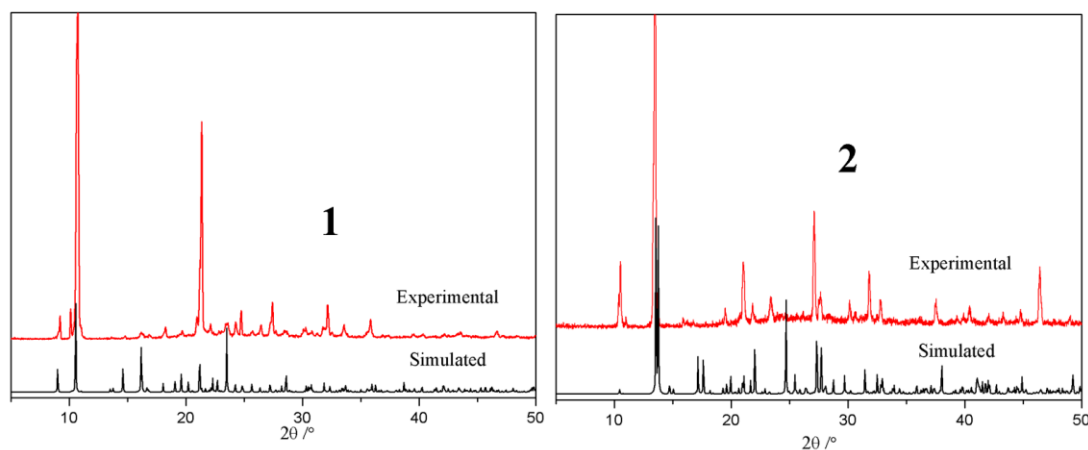

**Figure S5.** Simulated and experimental powder XRD patterns of **1** and **2**, respectively.

The powder X-ray diffraction patterns for **1** and **2** are in good agreement with the patterns based on each single-crystal X-ray solution in position, indicating the phase purity of the as-synthesized samples of the two compounds.
